# Supplementary material for: Pharmacogenetics of toxicity of 5-fluorouracil, doxorubicin and cyclophosphamide chemotherapy in breast cancer patients
Source: PubMed Central journal article supplement (PMC5823653; doi:10.18632/oncotarget.24148), 2018-01-10
Supplement: oncotarget-09-9114-s001.pdf [file oncotarget-09-9114-s001.pdf]

## **Pharmacogenetics of toxicity of 5-fluorouracil, doxorubicin and cyclophosphamide chemotherapy in breast cancer patients**

### **SUPPLEMENTARY MATERIALS**

**Supplementary Table 1: Multivariate analysis of the associations between SNPs and risk of FAC toxicity.** See Supplementary\_Table 1

**Supplementary Table 2: Characteristics of breast cancer patients group.** See Supplementary\_Table 2
